# Supplementary material for: A novel bifunctional Pd–ZIF-8/rGO catalyst with spatially separated active sites for the tandem Knoevenagel condensation–reduction reaction
Source: Royal Society of Chemistry journal article supplement (doi:10.1039/c7cy01725a), 2017-01-01
Supplement: c7cy01725a1.pdf [file c7cy01725a1.pdf]

## Electronic Supplementary Information

### **A novel bifunctional Pd-ZIF-8/rGO catalyst with spatially separated active sites for the tandem Knoevenagel condensation-reduction reaction**

Hefang Wang,<sup>a</sup> Yansu Wang,<sup>a</sup> Aizhong Jia,<sup>a</sup> Cunyue Wang,<sup>a</sup> Luming Wu,<sup>a</sup> Yongfang Yang<sup>\*a</sup> and Yanji Wang<sup>\*a</sup>

Preparation of Pd/ZIF-8: firstly, 11.29 mg of polyvinyl-pyrrolidone (PVP) was added to the Na<sub>2</sub>PdCl<sub>4</sub> solution (2.56 mL, 0.01 M) at 25 °C. After stirring for 1.0 h, 100 mg of the dried ZIF-8 was added into the above solution and the mixture was stirred for 2.0 h. Then, 1.28 mL of NaBH<sub>4</sub> solution (0.1 M) was added dropwise into the reaction mixture with vigorous stirring at 0 °C. After further stirring for 5.0 h, the resultant mixture was isolated by filtration, washed three times with deionized water. Then, the resulting product was dried for 12.0 h in a vacuum oven (60 °C, -0.1 MPa).

Preparation of Pd/rGO: firstly, 100 mg of GO was dispersed in deionized water and sonicated for 2.0 h at 25 °C. Secondly, 11.29 mg of polyvinyl-pyrrolidone (PVP) was added to the Na<sub>2</sub>PdCl<sub>4</sub> solution (2.56 mL, 0.01 M) at 25 °C. After stirring for 1.0 h, the GO dispersion was added into the above solution and the mixture was stirred for 2.0 h. Then, 1.28 mL of NaBH<sub>4</sub> solution (0.1 M) was added dropwise into the reaction mixture with vigorous stirring at 0 °C. After further stirring for 5.0 h, the resultant mixture was isolated by filtration, washed three times with deionized water. Then, the resulting product was dried for 12.0 h in a vacuum oven (60 °C, -0.1 MPa).

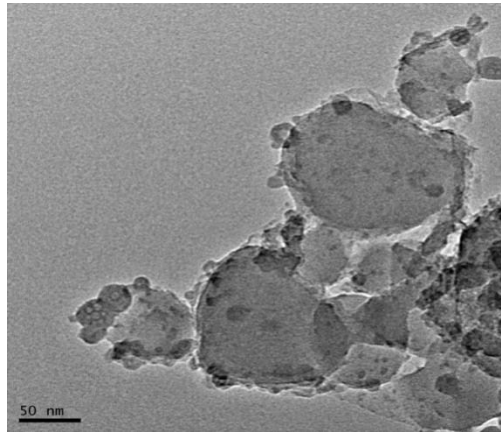

Fig. S1 TEM image of Pd-(ZIF-8+rGO)

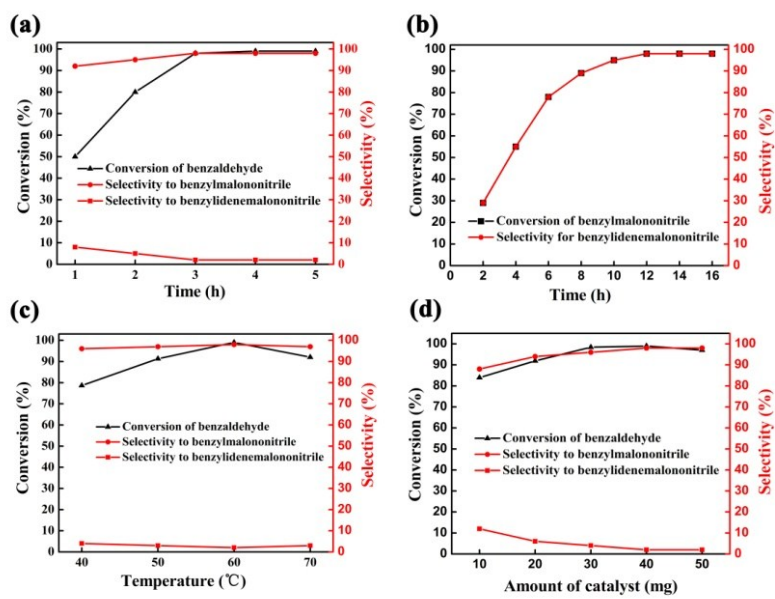

Fig. S2 The effects of Knoevenagel condensation time (a), reduction reaction time (b), reaction temperature (c) and catalyst amount (d) on the tandem reaction over Pd-ZIF-8/rGO.
